# Supplementary material for: Parallel Dysregulated Immune Response in Severe Forms of COVID-19 and Bacterial Sepsis via Single-Cell Transcriptome Sequencing
Source: MDPI journal article supplement (doi:10.3390/biomedicines11030778), 2023-03-03
Supplement: s1 [file s1]

## Supplementary\_material\_s1

**Table S1:** The full description of the *p* values for Figure 3.

| MILD COVID     | SEVERE COVID-19 | SEPSIS         | SEPTIC SHOCK   |
|----------------|-----------------|----------------|----------------|
| IGLC3          | IGLC3           | FOSB           | DEFA3          |
| FOSB           | MMP9            | IGLC3          | S100A12        |
| DEFA3          | FOSB            | DEFA3          | CD24           |
| S100A12        | S100A12         | HLA.A          | LGALS1         |
| FCGR3A         | DEFA3           | S100A12        | HLA.A          |
| IL32           | FCGR3A          | IL32           | IGLC3          |
| TRBC2          | CD52            | ENTPD1         | FCGR3A         |
| CCL5           | IGHG1_secreted  | FCGR3A         | FOSB           |
| IGHG1_SECRETED | HLA.A           | MMP9           | SELPLG         |
| CD3D           | CLEC4E          | LGALS1         | CEACAM8        |
| CD14           | LGALS1          | SELPLG         | LYN            |
| HLA.A          | CD24            | IGHG1_secreted | S100A10        |
| LGALS1         | SNCA            | TLR2           | STAT3          |
| LYN            | CEACAM8         | S100A10        | TOP2A          |
| CLEC4E         | LYN             | CD24           | IL32           |
| PTPRC          | S100A10         | ITGAE          | MMP9           |
| DUSP2          | IGHA1_secreted  | LYN            | PTPRC          |
| IGHM_MEMBRANE  | TOP2A           | PTPRC          | IGHG1_secreted |
| S100A10        | PTPRC           | CXCR4          | ENTPD1         |
| TLR2           | RGS1            | CD52           | CD52           |
| ALAS2          | TLR2            | CLEC4E         | ITGAE          |
| CXCL16         | IL32            | CD74           | RNASE2         |
| S100A9         | IGHM_membrane   | TNFSF8         | TYMS           |
| IGHM_SECRETED  | TRBC2           | CEACAM8        | C10orf54       |
| CD52           | CD3D            | SNCA           |                |
| CD3E           | BCL2A1          | C1QB           |                |
| RGS1           | C1QB            | IGHA1_secreted |                |
| CD74           | DUSP1           | CASP5          |                |
| PIK3AP1        | ENTPD1          | PI3            |                |
| IFITM3         | CXCL16          | GAPDH          |                |
| NKG7           | S100A9          |                |                |
| TNFSF8         | FN1             |                |                |
| IL7R           |                 |                |                |
| LAMP1          |                 |                |                |
| CD24           |                 |                |                |
| SNCA           |                 |                |                |
| IGKC           |                 |                |                |
| SELPLG         |                 |                |                |
| CASP5          |                 |                |                |

|                     | severe    | non_severe |
|---------------------|-----------|------------|
| <b>B cells</b>      | 0.4492    | < 2.2e-16  |
| <b>NK</b>           | 0.5385    | 3.61E-03   |
| <b>CD4 naive</b>    | 2.79E-07  | < 2.2e-16  |
| <b>CD4 memory</b>   | 0.5725    | 2.94E-15   |
| <b>CD8 naive</b>    | 2.63E-01  | 1.15E-12   |
| <b>CD8 memory</b>   | 0.8756    | 0.09553    |
| <b>Gamma delta</b>  | 0.05197   | 0.1421     |
| <b>Dendritic</b>    | 0.5725    | 0.8226     |
| <b>classic</b>      | < 2.2e-16 | 8.54E-12   |
| <b>nonclassical</b> | 0.03279   | 1.09E-08   |

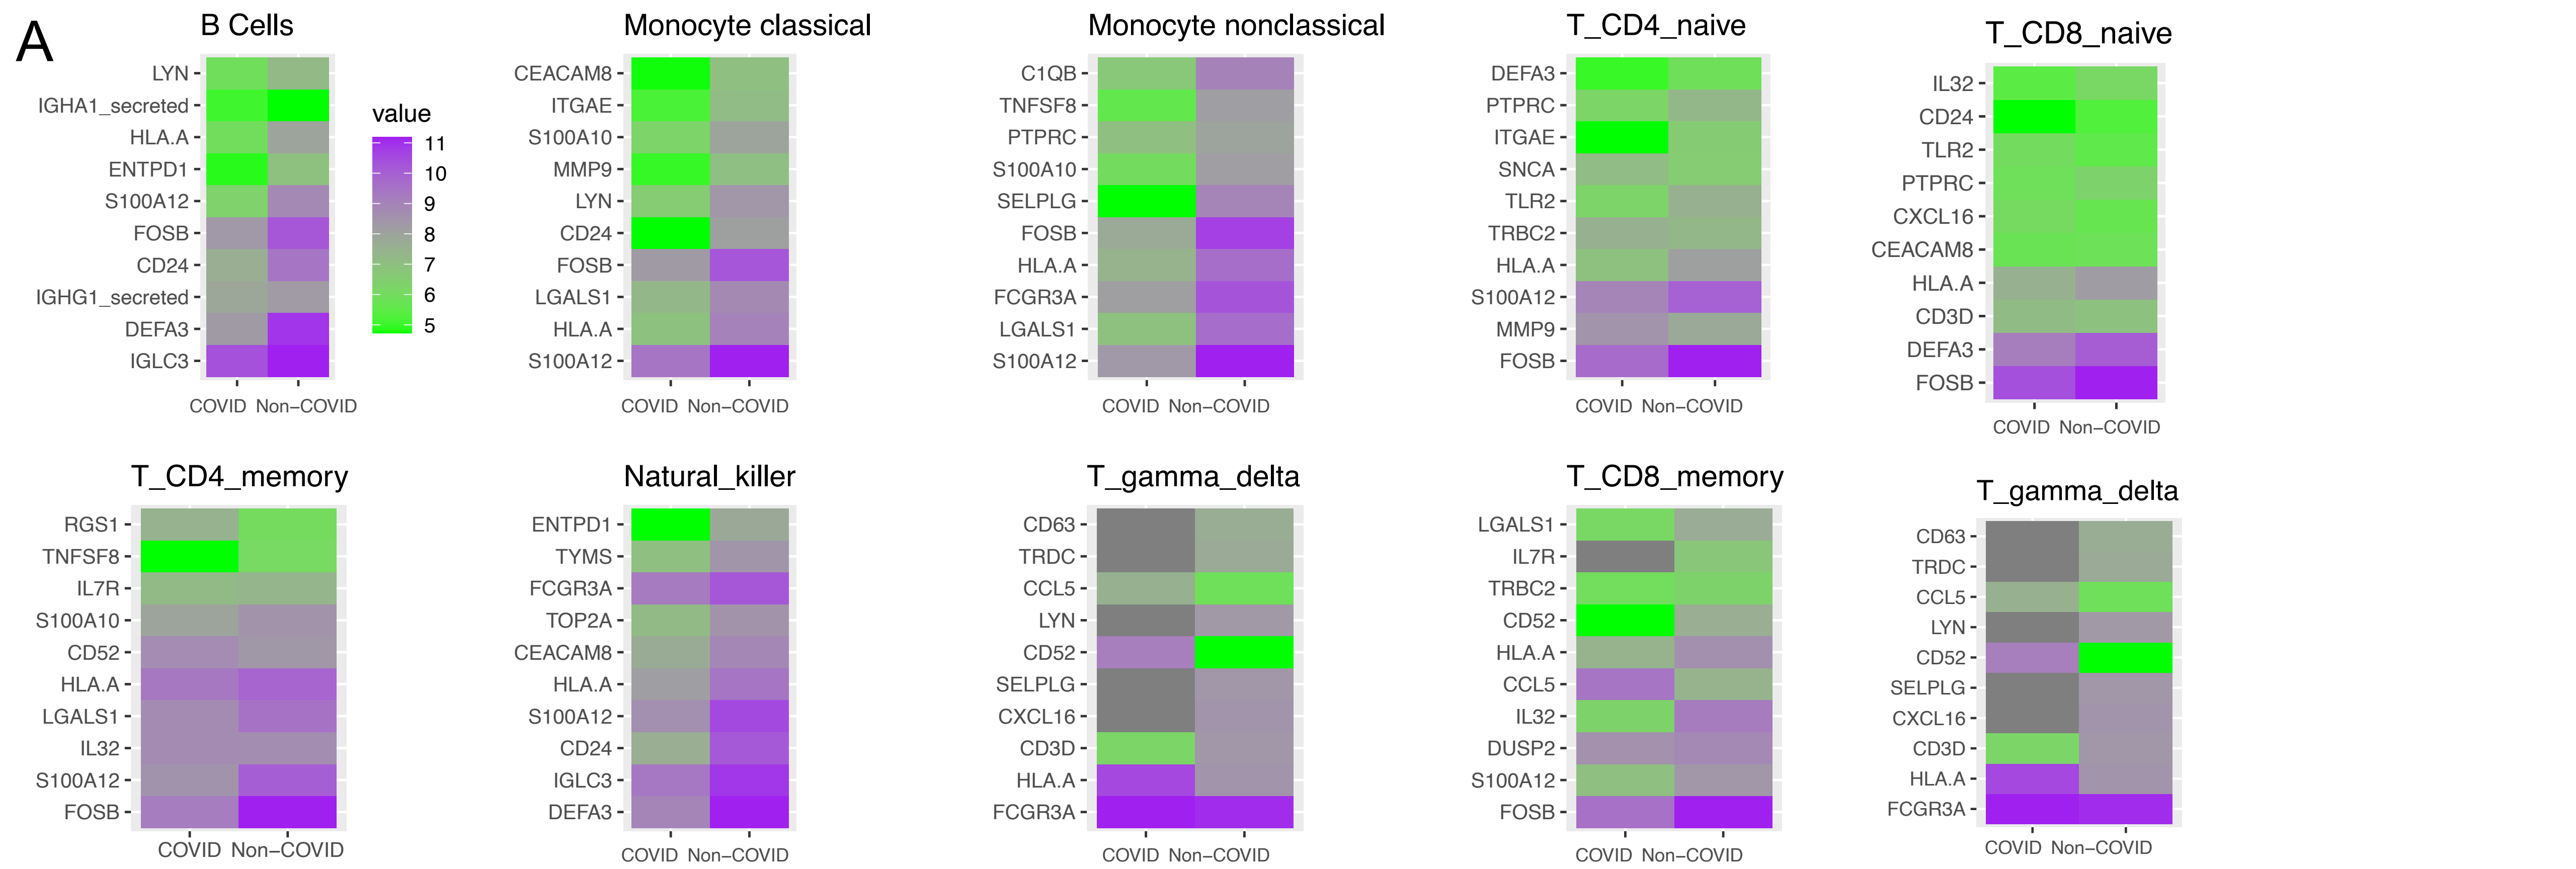

**B**

|              | B | NK | Monocyte<br>classical | Monocyte<br>nonclassical | TCD4 naive | TCD4<br>memory | TCD8 naive | TCD8<br>memory | T gamma<br>delta | Dendritic |
|--------------|---|----|-----------------------|--------------------------|------------|----------------|------------|----------------|------------------|-----------|
| COVID ICU    |   |    |                       |                          |            |                |            |                |                  |           |
| Mild COVID   |   |    |                       |                          |            |                |            |                |                  |           |
| Sepsis       |   |    |                       |                          |            |                |            |                |                  |           |
| Septic shock |   |    |                       |                          |            |                |            |                |                  |           |

**Figure S1:** The unique, most commonly expressed genes in COVID-19 and bacterial sepsis patients with mild and severe disease manifestations.

## Supplementary\_material\_S3

**Table S2:** Antibiotic dose administration in ICU patients.

[illegible]
